# Supplementary material
Source: PubMed Central journal article supplement (PMC5728102)
Supplement: ba011197-suppl1.pdf [file ba011197-suppl1.pdf]

**Table S1. 95 targeted genes and exons.**

|    | <b>Gene</b>   | <b>Exon</b>    |
|----|---------------|----------------|
| 1  | <i>ABL1</i>   | e2-e10         |
| 2  | <i>ASXL1</i>  | e1-e13         |
| 3  | <i>ATM</i>    | e2-e63         |
| 4  | <i>BCL11B</i> | e4             |
| 5  | <i>BCOR</i>   | e2-e15         |
| 6  | <i>BCORL1</i> | e1-e12         |
| 7  | <i>BRAF</i>   | e15            |
| 8  | <i>BRCC3</i>  | e3-e11         |
| 9  | <i>CALR</i>   | e9             |
| 10 | <i>CBL</i>    | e7-e8          |
| 11 | <i>CBLB</i>   | e9-e11         |
| 12 | <i>CD79B</i>  | e5-e6          |
| 13 | <i>CEBPA</i>  | e1             |
| 14 | <i>CNOT3</i>  | e1-e2          |
| 15 | <i>CREBBP</i> | e2-e21, e23-31 |
| 16 | <i>CRLF2</i>  | e6             |
| 17 | <i>CSF1R</i>  | e22            |
| 18 | <i>CSF3R</i>  | e14-e18        |
| 19 | <i>CTCF</i>   | e3-e12         |
| 20 | <i>CTNNB1</i> | e2-e4          |
| 21 | <i>CUX1</i>   | e1-e21         |
| 22 | <i>CXCR4</i>  | e2             |
| 23 | <i>DNMT3A</i> | e2-e23         |
| 24 | <i>DNMT3B</i> | e2-e23         |
| 25 | <i>EED</i>    | e1-e12         |
| 26 | <i>EGFR</i>   | e18-e21        |
| 27 | <i>EP300</i>  | e18-e27        |
| 28 | <i>ETV6</i>   | e1-e8          |
| 29 | <i>EZH2</i>   | e2-e8, e11-e20 |
| 30 | <i>FANCL</i>  | e1-e14         |
| 31 | <i>FBXW7</i>  | e8-e12         |
| 32 | <i>FLT3</i>   | e14-e16, e20   |
| 33 | <i>GATA1</i>  | e2-e6          |
| 34 | <i>GATA2</i>  | e2-e6          |
| 35 | <i>GATA3</i>  | e4-e6          |
| 36 | <i>GNAS</i>   | e8-e9          |
| 37 | <i>GNB1</i>   | e5-e6          |
| 38 | <i>IDH1</i>   | e4             |
| 39 | <i>IDH2</i>   | e4             |
| 40 | <i>IKZF1</i>  | e2-e8          |
| 41 | <i>IKZF2</i>  | e1-e8          |
| 42 | <i>IKZF3</i>  | e1-e8          |
| 43 | <i>IL7R</i>   | e6             |

|    |                |                        |
|----|----------------|------------------------|
| 44 | <i>JAK1</i>    | e10-e25                |
| 45 | <i>JAK2</i>    | e12, e14               |
| 46 | <i>JAK3</i>    | e11-e24                |
| 47 | <i>KIT</i>     | e8-9, e11, e17         |
| 48 | <i>KRAS</i>    | e2-e5                  |
| 49 | <i>LUC7L2</i>  | e3-e11                 |
| 50 | <i>MAP2K1</i>  | e2-e3                  |
| 51 | <i>MEF2B</i>   | e3                     |
| 52 | <i>MPL</i>     | e10                    |
| 53 | <i>MYD88</i>   | e5                     |
| 54 | <i>NOTCH1</i>  | e24-e28, e34           |
| 55 | <i>NOTCH2</i>  | e24-e28, e34           |
| 56 | <i>NOTCH3</i>  | e25-e26, e33           |
| 57 | <i>NPM1</i>    | e10-e11                |
| 58 | <i>NRAS</i>    | e2-e5                  |
| 59 | <i>NT5C2</i>   | e9, e11, e13, e15, e17 |
| 60 | <i>PAX5</i>    | e3, e6-e7              |
| 61 | <i>PDGFRA</i>  | e10-e21, e23           |
| 62 | <i>PDS5B</i>   | e3-e35                 |
| 63 | <i>PHF6</i>    | e2-e10                 |
| 64 | <i>PIGA</i>    | e2-e6                  |
| 65 | <i>PIK3CA</i>  | e2, e10, e21           |
| 66 | <i>PIM1</i>    | e1-e6                  |
| 67 | <i>PRPF40B</i> | e2-e26                 |
| 68 | <i>PRPF8</i>   | e2-e43                 |
| 69 | <i>PTEN</i>    | e1-e9                  |
| 70 | <i>PTPN11</i>  | e1-e15                 |
| 71 | <i>RAD21</i>   | e2-e14                 |
| 72 | <i>RET</i>     | e7                     |
| 73 | <i>RIT1</i>    | e1-e6                  |
| 74 | <i>RPL10</i>   | e5                     |
| 75 | <i>RUNX1</i>   | e2-e9                  |
| 76 | <i>SETBP1</i>  | e4                     |
| 77 | <i>SETD2</i>   | e1-e4, e6-e21          |
| 78 | <i>SF1</i>     | e1-e10, e13            |
| 79 | <i>SF3A1</i>   | e1-e2, e5-e16          |
| 80 | <i>SF3B1</i>   | e12-e16                |
| 81 | <i>SH2B3</i>   | e2-e8                  |
| 82 | <i>SMC1A</i>   | e1-e25                 |
| 83 | <i>SMC3</i>    | e2-e29                 |
| 84 | <i>SRSF2</i>   | e1                     |
| 85 | <i>STAG2</i>   | e3-e35                 |
| 86 | <i>STAT3</i>   | e2-e17, e21-23         |
| 87 | <i>TET2</i>    | e3-e11                 |
| 88 | <i>TLR2</i>    | e1                     |
| 89 | <i>TP53</i>    | e2-e11                 |
| 90 | <i>U2AF1</i>   | e2, e6                 |

|    |              |         |
|----|--------------|---------|
| 91 | <i>U2AF2</i> | e1-e12  |
| 92 | <i>WHSC1</i> | e17-e18 |
| 93 | <i>WT1</i>   | e1-e10  |
| 94 | <i>XPO1</i>  | e15-e16 |
| 95 | <i>ZRSR2</i> | e1-e11  |

---

**Table S2. Clinicopathologic details of patients with non-SH2 domain *STAT3* variants.**

|                                                           | NGS Indication               | Specimen | Tissue involvement (%) | Lymphoid cells present on marrow aspirate | Status-post allo-transplant | Variant (variant allele fraction)                                                                                                                                                                                      | <i>STAT3</i> domain localization | <i>STAT3</i> population frequency (ExAC Browser) Lek M et al. <i>Nature</i> . 2016. 536:285–291. (accessed 8-20-2017) | <i>STAT3</i> population frequency (gnomAD Browser) Lek M et al. <i>Nature</i> . 2016. 536:285–291. (accessed 8-20-2017) |
|-----------------------------------------------------------|------------------------------|----------|------------------------|-------------------------------------------|-----------------------------|------------------------------------------------------------------------------------------------------------------------------------------------------------------------------------------------------------------------|----------------------------------|-----------------------------------------------------------------------------------------------------------------------|-------------------------------------------------------------------------------------------------------------------------|
| Somatic <i>STAT3</i> mutations                            | Chronic lymphocytic leukemia | Blood    | 98%                    | N/A                                       | No                          | <i>STAT3</i> c.172G>A p.H58Y (28.9%)<br>CNOT3 c.58G>A p.E20K (16.5%)                                                                                                                                                   | N-terminal                       | No                                                                                                                    | No                                                                                                                      |
|                                                           | Macrocytic anemia            | Marrow   | N/A                    | 15%                                       | No                          | <i>STAT3</i> c.514delC p.D171fs* (22.3%)                                                                                                                                                                               | Coiled-coil                      | No                                                                                                                    | No                                                                                                                      |
|                                                           | BPDCN                        | Blood    | ND                     | N/A                                       | No                          | <i>STAT3</i> c.718C>G p.L240V (35.4%)                                                                                                                                                                                  | Coiled-coil                      | No                                                                                                                    | No                                                                                                                      |
|                                                           | Acute myeloid leukemia       | Marrow   | 27%                    | 24%                                       | No                          | <i>STAT3</i> c.1145G>A p.R382Q (6.7%)<br>EZH2 c.2069G>A p.R690H (21.0%)<br>RIT1 c.104G>C p.S35T (11.2%)                                                                                                                | DNA-binding                      | No                                                                                                                    | No                                                                                                                      |
|                                                           | Primary myelofibrosis        | Marrow   | N/A                    | 6%                                        | No                          | <i>STAT3</i> c.2060C>T p.C687Y (10.1%)<br>JAK2 c.1849G>T p.V617F (35.7%)                                                                                                                                               | SH2-TA border                    | 1 of 121,410                                                                                                          | No                                                                                                                      |
| Variant allele fraction, and population allele frequency) | Chronic lymphocytic leukemia | Marrow   | 90%                    | N/A                                       | Yes                         | <i>STAT3</i> c.62T>C p.L21P (3.1%)                                                                                                                                                                                     | N-terminal                       | No                                                                                                                    | No                                                                                                                      |
|                                                           | Myelodysplastic syndrome     | Marrow   | N/A                    | N/A                                       | No                          | <i>STAT3</i> c.137G>A p.A46V (50.0%)<br>SRSF2 c.284G>T p.P95H (58.2%)<br>STAG2 c.1002G>A p.W334* (24.8%)<br>STAG2 c.2325C>G p.Y775* (6.0%)<br>STAG2 c.1096_1097insT p.L366fs* (9.6%)<br>RUNX1 c.493C>T p.G165S (42.5%) | N-terminal                       | No                                                                                                                    | No                                                                                                                      |
|                                                           | Leukopenia, thrombocytopenia | Blood    | N/A                    | N/A                                       | No                          | <i>STAT3</i> c.361A>T p.T121S (56.6%)                                                                                                                                                                                  | N-terminal                       | No                                                                                                                    | 1 of 231,666                                                                                                            |
|                                                           | Acute myeloid leukemia       | Blood    | ND                     | N/A                                       | Yes                         | <i>STAT3</i> c.562G>T p.L188M (27.5%)<br>ASXL1 c.2175delA p.R725fs* (23.4%)<br>SRSF2 c.284G>A p.P95L (24.1%)<br>TET2 c.4105T>C p.S1369P (26.8%)<br>TET2 c.5654C>T p.P1885L (17.8%)                                     | Coiled-coil                      | 2 of 120,756                                                                                                          | 18 of 276,848                                                                                                           |
|                                                           | Acute myeloid leukemia       | Marrow   | 83%                    | N/A                                       | Yes                         | <i>STAT3</i> c.581C>T p.S194L (10.1%)<br>NPM1 c.863_864insCCGA p.W288fs*10 (43.9%)<br>TP53 c.524G>A p.R175H (80.7%)<br>TET2 c.3679G>T p.V1227L (7.2%)<br>PRPF8 c.4808C>A p.A1603E (26.7%)                              | Coiled-coil                      | No                                                                                                                    | 1 of 246,012                                                                                                            |

| Presumed germline STAT3 variants (based on domain localization, variant allele frequency) | Variant Information |        |            |                  | Variant Details                                                                                                                                                                                                                                                                  |                | Variant Frequency |                 |             |
|-------------------------------------------------------------------------------------------|---------------------|--------|------------|------------------|----------------------------------------------------------------------------------------------------------------------------------------------------------------------------------------------------------------------------------------------------------------------------------|----------------|-------------------|-----------------|-------------|
|                                                                                           | Disease             | Tissue | Prevalence | Allele Frequency | Variant                                                                                                                                                                                                                                                                          | Protein Domain | Variant Count     | Allele Count    | Total Count |
| Mast cell activation syndrome                                                             | Marrow              | N/A    | N/A        | No               | STAT3 c.594G>C p.Q198H (60.7%)<br>KRAS c.35G>A p.G12D (3.3%)                                                                                                                                                                                                                     | Coiled-coil    | 1 of 121,226      | 3 of 246,078    |             |
| LGL leukemia                                                                              | Blood               | 26%    | N/A        | No               | STAT3 c.832C>T p.R278C (48.2%)<br>STAT3 c.1940A>T p.N647I (14.1%)*                                                                                                                                                                                                               | Coiled-coil    | No                | No              |             |
| Multiple myeloma                                                                          | Marrow              | 12%    | N/A        | No               | STAT3 c.900G>T p.Q300H (51.4%)                                                                                                                                                                                                                                                   | Coiled-coil    | No                | 1 of 246,264    |             |
| Pancytopenia                                                                              | Blood               | N/A    | N/A        | No               | STAT3 c.1381C>G p.V461L (52.5%)                                                                                                                                                                                                                                                  | DNA-binding    | 515 of 121,306    | 1698 of 277,040 |             |
| Acute myeloid leukemia                                                                    | Marrow              | 85%    | N/A        | No               | STAT3 c.1381G>C p.V461L (53.2%)                                                                                                                                                                                                                                                  | DNA-binding    | 515 of 121,306    | 1698 of 277,040 |             |
| MSD/MPN                                                                                   | Marrow              | N/A    | N/A        | No               | STAT3 c.1381G>C p.V461L (48.5%)                                                                                                                                                                                                                                                  | DNA-binding    | 515 of 121,306    | 1698 of 277,040 |             |
| Lymphoplasmacytic lymphoma                                                                | Marrow              | 34%    | N/A        | No               | STAT3 c.1381G>C p.V461L (50.2%)<br>MYD88 c.794T>C p.L265P (2.7%)<br>CXCR4 c.1000C>T p.R338* (5.7%)                                                                                                                                                                               | DNA-binding    | 515 of 121,306    | 1698 of 277,040 |             |
| B-lymphoblastic lymphoma                                                                  | Blood               | ND     | N/A        | No               | STAT3 c.1492T>C p.I498V (47.9%)                                                                                                                                                                                                                                                  | Linker         | 42 of 121,404     | 78 of 277,222   |             |
| Acute myeloid leukemia                                                                    | Marrow              | 82%    | N/A        | No               | STAT3 c.2050G>C p.G684R (44.1%)<br>DNMT3A c.2645G>A p.R882H (31.9%)<br>TP53 c.844C>T p.R282W (29.9%)                                                                                                                                                                             | TA             | 7 of 121,412      | 15 of 277,230   |             |
| Leukocytosis, splenomegaly                                                                | Blood               | N/A    | N/A        | No               | STAT3 c.2082T>A p.H694Q (49.4%)                                                                                                                                                                                                                                                  | TA             | 8 of 121,404      | 23 of 277,244   |             |
| Acute myeloid leukemia                                                                    | Blood               | 75%    | N/A        | No               | STAT3 c.2174C>T p.P725L (56.5%)<br>BCORL1 c.3895C>T p.R1299* (94.7%)<br>DNMT3A c.2644C>T p.R882C (46.4%)<br>IDH1 c.394C>T p.R132C (46.1%)<br>STAG2 c.775C>T p.R259* (84.0%)<br>WT1 c.1288C>T p.R362* (47.2%)<br>DNMT3A c.2645G>A p.R882H (15.2%)<br>TP53 c.637C>T p.R213* (5.9%) | TA             | 1 of 120,632      | 1 of 245,438    |             |
| Leukocytosis, thrombocytopenia                                                            | Blood               | N/A    | N/A        | No               | STAT3 c.2174G>A p.P725L (61.5%)<br>DNMT3A c.1227C>T p.W409* (41.3%)                                                                                                                                                                                                              | TA             | 1 of 120,632      | 1 of 245,438    |             |
| Flushing                                                                                  | Blood               | N/A    | N/A        | No               | STAT3 c.2228G>T p.G743V (68.8%)                                                                                                                                                                                                                                                  | TA             | 20 of 121,266     | 35 of 277,048   |             |

N/A, not applicable; ND, no data; TA, transactivation  
BPDCN, blastic plasmacytoid dendritic cell neoplasm  
MDS/MPN, myelodysplastic/myeloproliferative neoplasm  
\*Somatic mutation
